# Supplementary material for: Modular plug-and-play engineering of Klebsiella phages with dual receptor-binding proteins for efficient host range design
Source: Research Square preprint supplement (doi:10.21203/rs.3.rs-8542153/v1), 2026-02-13
Supplement: Supplementary file 1 [file 57f961af527cbdbd86bc091e.pdf]

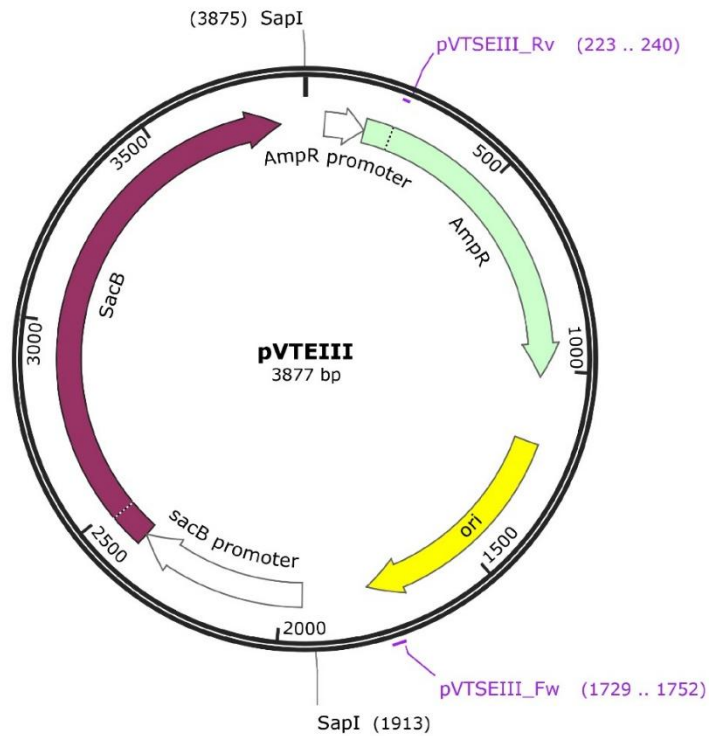

**Supplementary Fig. S1: Vector map of the cloning vector pVTE used in the VersaTile technique to construct tiles.** Figure obtained using SnapGene v7.1.1.

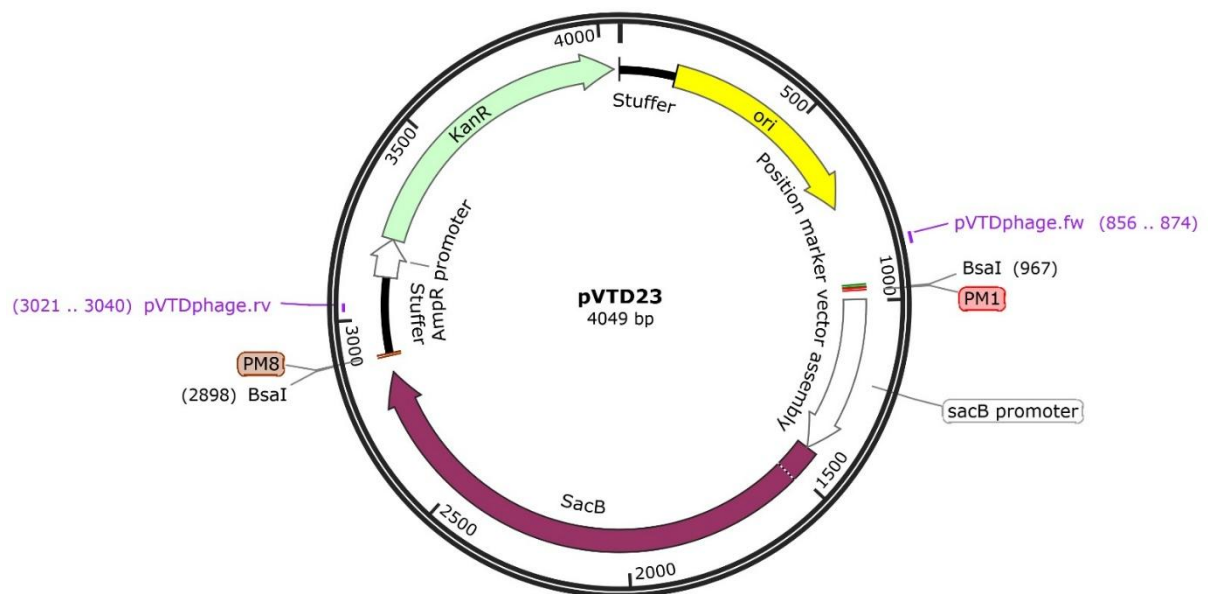

**Supplementary Fig. S2: Vector map of destination vector pVTD23 used in the VersaTile technique to construct RBP gene clusters.** Figure obtained using SnapGene v7.1.1

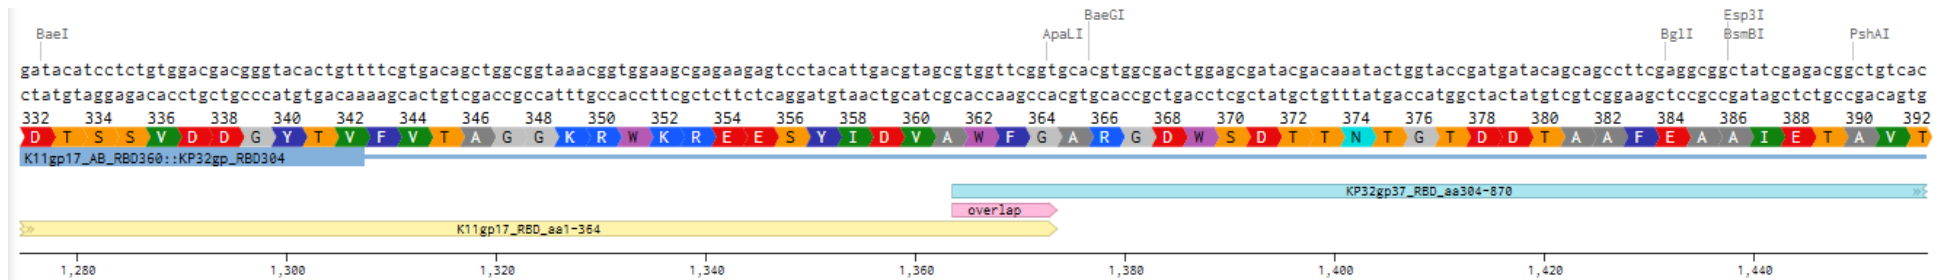

**Supplementary Fig. S3: Homologous recombination spot of engineered phage K11gp17\_RBD1aa364::KP32gp37\_RBD1aa304**
