# Supplementary material for: Modular plug-and-play engineering of Klebsiella phages with dual receptor-binding proteins for efficient host range design
Source: Research Square preprint supplement (doi:10.21203/rs.3.rs-8542153/v1), 2026-02-13
Supplement: Supplementary file 1 [file e5cc1e96e469b595f6ec5daa.xlsx]

## Sheet: Supplementary table S8
Wild-type phages	Name RBP1	sequence (nt)	sequence (aa)	length (nt)	length (aa)		Name RBP2	length (nt)	length (aa)	sequence RBPC (nt)	length
Supplementary table S8: Overview of the chimeric RBP gene clusters of the. This table provides an overview of the RBP gene clusters of the phages included in this research. The names of the phage, RBP1, and RBP2 are listed together with their respective nucleotide and amino acid sequences, sequence lengths, and total RBP gene cluster length. Additionally, AlphaFold2-predicted RBP structures are s…
Name phage	Name RBP1	sequence (nt)	sequence (aa)	Length (nt)	Length (aa)	Alphafold2 predicted RBP structure (Colored by pLLDT Confidence Levels)	Name RBP2	Length (nt)	Length (aa)	Total sequence RBP gene cluster (nt)	length (nt)	Alphafold2 predicted RBP structure (Colored by pLLDT Confidence Levels)
Wild-type phages
K11	K11gp17	atggaccaagacattaaaacagtcattcagtacccagtaggggccactgagttcgacatcccgttcgactacctgtcccgtaagtttgtccgtgtgtcgctggcagctgacgacaaccgcagactgctgagtaacatcactgagtaccgctacgtgtctaagaccagagtgaagctccttgtggaaactaccgggttcgaccgtgtggaaatccgcagattcacctcagcgtctgagcgtattgttgacttcagcgacggctccgtactgcgggcaacagaccttaacgtttctcagattcagtctgcccatatcgcagaggaagcacgtgattcagcactgttggctatgccgcaggatgatgctggcaaccttgatgcccgtaaccgcagaatcgtt…	MDQDIKTVIQYPVGATEFDIPFDYLSRKFVRVSLAADDNRRLLSNITEYRYVSKTRVKLLVETTGFDRVEIRRFTSASERIVDFSDGSVLRATDLNVSQIQSAHIAEEARDSALLAMPQDDAGNLDARNRRIVRLAPGVEGTDAINKNQLDTTLGEAGGILSEIKQTEKDIQDYIENFADDTTSLKGINWVYNNGSANGGETSILITREGPVFAVPTIYINGDRQSVGYHYSYDSGDKTIHLVKPLTAGDFVECVTSEGVLPLSNLLSTPDGASQIGTKSGLTVQDYLNGVKSATILRNIEPVIDGQRIVLSEISPTLGPKSGGTLVYDQSDTSSVDDGYTVFVTAGGKRWKREESYIDVAWFGPNFGLALQTAVNLVDNYVRTVGFYSRKTIYIAAGT…	2628	875		K11gp0043	1791	596	tgactggcctgatgaactccaccaaggagcttgttccgaacgacccactgacccagcagctcatcatgaaaatctatgaagccaacggggtcaccatcaagcagcagccgaagcctaactaattaggacacactatagggaggccgattggtttccccccttctcattcaactaaaggaggtcaccatggaccaagacattaaaacagtcattcagtacccagtaggggccactgagttcgacatcccgttcgactacctgtcccgtaagtttgtccgtgtgtcgctggcagctgacgacaaccgcagactgctgagtaacatcactgagtaccgctacgtgtctaagaccagagtgaagctccttgtggaaactaccgggttcgaccgtgtggaaatc…	4812
KP32	KP32gp37	atggaccaagatattaaaacaatcattcagtacccaacaggagccactgagtttgacatcccgtttgactacctgtcccgcaagtttgtccgcgtgtctctggtatcggacgacaaccgccgactcttgcgcaacatcacggagtaccgttacgtgtcgaagactcgcgttaagattctggtggacaccactgggttcgaccgagttgaaatccgacggttcacctcagcgtctgaacgtgttgtggacttcagtgatggctctgtgctccgcgctaacgacctaaacgtgtcccagctacagtcttcacatattgccgaagaggcccgtgacagtgcgcttctggccatgcctgaggatgatgctggtaacctcgacgcgagaaaccgtaagattgtc…	MDQDIKTIIQYPTGATEFDIPFDYLSRKFVRVSLVSDDNRRLLRNITEYRYVSKTRVKILVDTTGFDRVEIRRFTSASERVVDFSDGSVLRANDLNVSQLQSSHIAEEARDSALLAMPEDDAGNLDARNRKIVRLAPGEVGTDAVNKDQLDTTLGEAGGILSEIKQTQQDIGDYIEEFANGTTYLKNIVMVYNQGSANGGETAIVLDRTDEVFAVPVIYINGDRQEVGFQFSYDNTTKTITLVKPLQRGDFVVMLTSEGTHSLASILAGPDGASRIGASGGLTVQQAIDRILESHIILPQWFGARGDWSDTTNTGTDDTAAFEAAIEMAVTLNYTEVYVPAGSYLITRELNLNGGNRNTRLGARIRGAGWASSVLVFKAPAPETPCISIIGTPGSHTSK…	2610	869		KP32gp38	1731	576	ggcctgatgaactccaccaaggagcttgttccgaacgacccactgacccagcagctcatcatgaaaatctatgaagccaacggggtcaccatcaagcagcagccgaagcctaactaattaggacacactatagggaggccgattggtttccccccttctcattcaactaaaggaggtcaccatggaccaagacattaaaacagtcattcagtacccagtaggggccactgagttcgacatcccgttcgactacctgtcccgtaagtttgtccgtgtgtcgctggcagctgacgacaaccgcagactgctgagtaacatcactgagtaccgctacgtgtctaagaccagagtgaagctccttgtggaaactaccgggttcgaccgtgtggaaatccgcag…	4749
KP34	KP34gp57	ATGGCACTCACTAAACTAGTAGATGCAGGCGCCTGGCAAGTAGAAGTAGCCCCAGCTGGCACAGTACAGGATTCCCTAGTATTCTTATCCCCACGCAACTTCGGAGGAGTACCAGGCACGGGCGTAGATAGTGTAGCAGCTATAGAAGCCGCCCTAGCGGCAGGCGACGTAGACTTAGGTGGTGAGCACTGGTTTATTAGCAGGCCCATCTATTGCGTATCCGGCCGTACCATTCAGAACGGTAAGATTTCTACCTTAGCAGCCCAAGGCTCTGGGTTTATGGCTGGCAGTATCTTCGCACCGGGGAACTATCACCCTGTATACGTAGACCCTGTGCCGAAGCTGGCATGCTCAAGTACAAACGGCTCAGCCACTATTACAGTAAGCTCTCACGAGTTC…	MALTKLVDAGAWQVEVAPAGTVQDSLVFLSPRNFGGVPGTGVDSVAAIEAALAAGDVDLGGEHWFISRPIYCVSGRTIQNGKISTLAAQGSGFMAGSIFAPGNYHPVYVDPVPKLACSSTNGSATITVSSHEFVVGDLVRLSSTRGIIGSDAVLVPWYMQLARVVGVSGDTVKLDAPIDTTETLVVHKATPAGYNARFNKPLFVLERATFRNIEVDTWDYWTADSATFECAFEGIRGKARSVVYGNTFCRTNFDNIDITFSNKASEMAFGSHDTNLSNIKFRADSQNWDSTNSVGISWAESGRRCTLDNWQLLVPQGVNLSVLVRISSHRDVQIRKGFIQVHSSSNNILSVEHYGGDRPPCNNILFEDIDVNATGAAAVVVDVYKSANDSAINAVRFEG…	1893	630
KP36	KP36gp50	ATGGCACTATACAGAGAAGGCAAAGCGGCTATGGCCGCAGACGGAACCGTTACCGGGACTGGCACAAAATGGCAATCTTCGCTTTCGCTGATTCGCCCAGGCGCGACGATTATGTTTTTGTCGTCACCAATTCAAATGGCCGTCGTAAACAAGGTGGTTAGCGATACTGAAATTAAAGCCATCACCACAAACGGCGCTGTCGTAGCGTCTAGCGATTACGCGATCCTGTTAAGTGACTCACTTACCGTTGACGGTCTGGCGCAAGATGTTGCTGAAACTCTGCGCTACTATCAGTCACAGGAAACCGTGATCGCGGATGCAGTCGAGTTCTTCAAGAACTTTGATTTCGATTCCCTGCAAGATCTTGCTAACCAAATTAATGCAGACTCTGAATCTGCA…	MALYREGKAAMAADGTVTGTGTKWQSSLSLIRPGATIMFLSSPIQMAVVNKVVSDTEIKAITTNGAVVASSDYAILLSDSLTVDGLAQDVAETLRYYQSQETVIADAVEFFKNFDFDSLQDLANQINADSESAQSSAAAAAASENAAKTSENNAKSSEVAAENARDQVQQIINDAGDASTLVVLANPDGFRHIGRCKDIATLRTIEPVESRQVIEVLSYYNGLAQGGGTFWYDPNDSVTEDNGGSCIVTNGGKRWKRIIDGAVDVLSFGAKPDDISFDSAPHIQAALDNHDAVSLYGRSYYIGSPIYMPSRTVFDGMGGKLTSIAPSTAGFMAGSIFAPGNYHPDFWEEVPKVAATTTLGSANITLADPNIVNVGDIIRLSSTTGVLSAGFFVSEYLQM…	2652	883
Phages with exchanged RBP1
KP32gp37_RBD1::K11gp17_RBD1	KP32gp37_AB _K11gp17RBD	ATGGACCAAGATATTAAAACAATCATTCAGTACCCAACAGGAGCCACTGAGTTTGACATCCCGTTTGACTACCTGTCCCGCAAGTTTGTCCGCGTGTCTCTGGTATCGGACGACAACCGCCGACTCTTGCGCAACATCACGGAGTACCGTTACGTGTCGAAGACTCGCGTTAAGATTCTGGTGGACACCACTGGGTTCGACCGAGTTGAAATCCGACGGTTCACCTCAGCGTCTGAACGTGTTGTGGACTTCAGTGATGGCTCTGTGCTCCGCGCTAACGACCTAAACGTGTCCCAGCTACAGTCTTCACATATTGCCGAAGAGGCCCGTGACAGTGCGCTTCTGGCCATGCCTGAGGATGATGCTGGTAACCTCGACGCGAGAAACCGTAAGATTGTC…	MDQDIKTIIQYPTGATEFDIPFDYLSRKFVRVSLVSDDNRRLLRNITEYRYVSKTRVKILVDTTGFDRVEIRRFTSASERVVDFSDGSVLRANDLNVSQLQSSHIAEEARDSALLAMPEDDAGNLDARNRKIVRLAPGEVGTDAVNKDQLDTTLGEAGGILSEIKQTQQDIGDYIEEFANGTTYLKNIVMVYNQGSANGGETAIVLDRTDEVFAVPVIYINGDRQEVGFQFSYDNTTKTITLVKPLQRGDFVVMLTSEGVLPLSNLLSTPDGASQIGTKSGLTVQDYLNGVKSATILRNIEPVIDGQRIVLSEISPTLGPKSGGTLVYDQSDTSSVDDGYTVFVTAGGKRWKREESYIDVAWFGPNFGLALQTAVNLVDNYVRTVGFYSRKTIYIAAGT…	2628	875		KP32gp38	1731	576	ggcctgatgaactccaccaaggagcttgttccgaacgacccactgacccagcagctcatcatgaaaatctatgaagccaacggggtcaccatcaagcagcagccgaagcctaactaattaggacacactatagggaggccgattggtttccccccttctcattcaactaaaggaggtcaccatggaccaagacattaaaacagtcattcagtacccagtaggggccactgagttcgacatcccgttcgactacctgtcccgtaagtttgtccgtgtgtcgctggcagctgacgacaaccgcagactgctgagtaacatcactgagtaccgctacgtgtctaagaccagagtgaagctccttgtggaaactaccgggttcgaccgtgtggaaatccgcag…	4749		15.8
K11gp17_RBD1::K11gp17_RBD1	K11gp17	atggaccaagacattaaaacagtcattcagtacccagtaggggccactgagttcgacatcccgttcgactacctgtcccgtaagtttgtccgtgtgtcgctggcagctgacgacaaccgcagactgctgagtaacatcactgagtaccgctacgtgtctaagaccagagtgaagctccttgtggaaactaccgggttcgaccgtgtggaaatccgcagattcacctcagcgtctgagcgtattgttgacttcagcgacggctccgtactgcgggcaacagaccttaacgtttctcagattcagtctgcccatatcgcagaggaagcacgtgattcagcactgttggctatgccgcaggatgatgctggcaaccttgatgcccgtaaccgcagaatcgtt…	MDQDIKTVIQYPVGATEFDIPFDYLSRKFVRVSLAADDNRRLLSNITEYRYVSKTRVKLLVETTGFDRVEIRRFTSASERIVDFSDGSVLRATDLNVSQIQSAHIAEEARDSALLAMPQDDAGNLDARNRRIVRLAPGVEGTDAINKNQLDTTLGEAGGILSEIKQTEKDIQDYIENFADDTTSLKGINWVYNNGSANGGETSILITREGPVFAVPTIYINGDRQSVGYHYSYDSGDKTIHLVKPLTAGDFVECVTSEGVLPLSNLLSTPDGASQIGTKSGLTVQDYLNGVKSATILRNIEPVIDGQRIVLSEISPTLGPKSGGTLVYDQSDTSSVDDGYTVFVTAGGKRWKREESYIDVAWFGPNFGLALQTAVNLVDNYVRTVGFYSRKTIYIAAGT…	2628	875		K11gp0043	1791	596	tgactggcctgatgaactccaccaaggagcttgttccgaacgacccactgacccagcagctcatcatgaaaatctatgaagccaacggggtcaccatcaagcagcagccgaagcctaactaattaggacacactatagggaggccgattggtttccccccttctcattcaactaaaggaggtcaccatggaccaagacattaaaacagtcattcagtacccagtaggggccactgagttcgacatcccgttcgactacctgtcccgtaagtttgtccgtgtgtcgctggcagctgacgacaaccgcagactgctgagtaacatcactgagtaccgctacgtgtctaagaccagagtgaagctccttgtggaaactaccgggttcgaccgtgtggaaatc…	4812		5F
Phages with exchanged RBP2
KP32gp38_RBD2::KP32gp38_RBD2	KP32gp37	atggaccaagatattaaaacaatcattcagtacccaacaggagccactgagtttgacatcccgtttgactacctgtcccgcaagtttgtccgcgtgtctctggtatcggacgacaaccgccgactcttgcgcaacatcacggagtaccgttacgtgtcgaagactcgcgttaagattctggtggacaccactgggttcgaccgagttgaaatccgacggttcacctcagcgtctgaacgtgttgtggacttcagtgatggctctgtgctccgcgctaacgacctaaacgtgtcccagctacagtcttcacatattgccgaagaggcccgtgacagtgcgcttctggccatgcctgaggatgatgctggtaacctcgacgcgagaaaccgtaagattgtc…	MDQDIKTIIQYPTGATEFDIPFDYLSRKFVRVSLVSDDNRRLLRNITEYRYVSKTRVKILVDTTGFDRVEIRRFTSASERVVDFSDGSVLRANDLNVSQLQSSHIAEEARDSALLAMPEDDAGNLDARNRKIVRLAPGEVGTDAVNKDQLDTTLGEAGGILSEIKQTQQDIGDYIEEFANGTTYLKNIVMVYNQGSANGGETAIVLDRTDEVFAVPVIYINGDRQEVGFQFSYDNTTKTITLVKPLQRGDFVVMLTSEGTHSLASILAGPDGASRIGASGGLTVQQAIDRILESHIILPQWFGARGDWSDTTNTGTDDTAAFEAAIEMAVTLNYTEVYVPAGSYLITRELNLNGGNRNTRLGARIRGAGWASSVLVFKAPAPETPCISIIGTPGSHTSK…	2610	869		KP32gp38	1731	576	accatggaccaagatattaaaacaatcattcagtacccaacaggagccactgagtttgacatcccgtttgactacctgtcccgcaagtttgtccgcgtgtctctggtatcggacgacaaccgccgactcttgcgcaacatcacggagtaccgttacgtgtcgaagactcgcgttaagattctggtggacaccactgggttcgaccgagttgaaatccgacggttcacctcagcgtctgaacgtgttgtggacttcagtgatggctctgtgctccgcgctaacgacctaaacgtgtcccagctacagtcttcacatattgccgaagaggcccgtgacagtgcgcttctggccatgcctgaggatgatgctggtaacctcgacgcgagaaaccgtaagatt…	4552		9C
KP32gp38_RBD2::K11gp0043_RBD2	KP32gp37	atggaccaagatattaaaacaatcattcagtacccaacaggagccactgagtttgacatcccgtttgactacctgtcccgcaagtttgtccgcgtgtctctggtatcggacgacaaccgccgactcttgcgcaacatcacggagtaccgttacgtgtcgaagactcgcgttaagattctggtggacaccactgggttcgaccgagttgaaatccgacggttcacctcagcgtctgaacgtgttgtggacttcagtgatggctctgtgctccgcgctaacgacctaaacgtgtcccagctacagtcttcacatattgccgaagaggcccgtgacagtgcgcttctggccatgcctgaggatgatgctggtaacctcgacgcgagaaaccgtaagattgtc…	MDQDIKTIIQYPTGATEFDIPFDYLSRKFVRVSLVSDDNRRLLRNITEYRYVSKTRVKILVDTTGFDRVEIRRFTSASERVVDFSDGSVLRANDLNVSQLQSSHIAEEARDSALLAMPEDDAGNLDARNRKIVRLAPGEVGTDAVNKDQLDTTLGEAGGILSEIKQTQQDIGDYIEEFANGTTYLKNIVMVYNQGSANGGETAIVLDRTDEVFAVPVIYINGDRQEVGFQFSYDNTTKTITLVKPLQRGDFVVMLTSEGTHSLASILAGPDGASRIGASGGLTVQQAIDRILESHIILPQWFGARGDWSDTTNTGTDDTAAFEAAIEMAVTLNYTEVYVPAGSYLITRELNLNGGNRNTRLGARIRGAGWASSVLVFKAPAPETPCISIIGTPGSHTSK…	2610	869		KP32gp38CP_K11gp0043	1788	595	TGACTGGCCTGATGAACTCCACAAAGGAGCTTGTGCCAAACGACCCGCTTACCCAACAGCTAATCATGAAAATCTATGAAGCTAATGGTGTCACCATAAAGCAGCAGCCTAGACCCAACTAATTAGGGCACACTATAGGGAGGCCGACTGGTTTCCCTCCTATTCAACTTAAGGAGGTCACCATGGACCAAGATATTAAAACAATCATTCAGTACCCAACAGGAGCCACTGAGTTTGACATCCCGTTTGACTACCTGTCCCGCAAGTTTGTCCGCGTGTCTCTGGTATCGGACGACAACCGCCGACTCTTGCGCAACATCACGGAGTACCGTTACGTGTCGAAGACTCGCGTTAAGATTCTGGTGGACACCACTGGGTTCGACCGAGTTGAAATCCGAC…	4788		7E
KP32gp38_RBD2::K11gp17_RBD1	KP32gp37	atggaccaagatattaaaacaatcattcagtacccaacaggagccactgagtttgacatcccgtttgactacctgtcccgcaagtttgtccgcgtgtctctggtatcggacgacaaccgccgactcttgcgcaacatcacggagtaccgttacgtgtcgaagactcgcgttaagattctggtggacaccactgggttcgaccgagttgaaatccgacggttcacctcagcgtctgaacgtgttgtggacttcagtgatggctctgtgctccgcgctaacgacctaaacgtgtcccagctacagtcttcacatattgccgaagaggcccgtgacagtgcgcttctggccatgcctgaggatgatgctggtaacctcgacgcgagaaaccgtaagattgtc…	MDQDIKTIIQYPTGATEFDIPFDYLSRKFVRVSLVSDDNRRLLRNITEYRYVSKTRVKILVDTTGFDRVEIRRFTSASERVVDFSDGSVLRANDLNVSQLQSSHIAEEARDSALLAMPEDDAGNLDARNRKIVRLAPGEVGTDAVNKDQLDTTLGEAGGILSEIKQTQQDIGDYIEEFANGTTYLKNIVMVYNQGSANGGETAIVLDRTDEVFAVPVIYINGDRQEVGFQFSYDNTTKTITLVKPLQRGDFVVMLTSEGTHSLASILAGPDGASRIGASGGLTVQQAIDRILESHIILPQWFGARGDWSDTTNTGTDDTAAFEAAIEMAVTLNYTEVYVPAGSYLITRELNLNGGNRNTRLGARIRGAGWASSVLVFKAPAPETPCISIIGTPGSHTSK…	2610	869		KP32gp38CP_K11gp17RBD	1965	654	TGACTGGCCTGATGAACTCCACAAAGGAGCTTGTGCCAAACGACCCGCTTACCCAACAGCTAATCATGAAAATCTATGAAGCTAATGGTGTCACCATAAAGCAGCAGCCTAGACCCAACTAATTAGGGCACACTATAGGGAGGCCGACTGGTTTCCCTCCTATTCAACTTAAGGAGGTCACCATGGACCAAGATATTAAAACAATCATTCAGTACCCAACAGGAGCCACTGAGTTTGACATCCCGTTTGACTACCTGTCCCGCAAGTTTGTCCGCGTGTCTCTGGTATCGGACGACAACCGCCGACTCTTGCGCAACATCACGGAGTACCGTTACGTGTCGAAGACTCGCGTTAAGATTCTGGTGGACACCACTGGGTTCGACCGAGTTGAAATCCGAC…	4965		12B/7.2
KP32gp38_RBD2::KP34gp57	KP32gp37	atggaccaagatattaaaacaatcattcagtacccaacaggagccactgagtttgacatcccgtttgactacctgtcccgcaagtttgtccgcgtgtctctggtatcggacgacaaccgccgactcttgcgcaacatcacggagtaccgttacgtgtcgaagactcgcgttaagattctggtggacaccactgggttcgaccgagttgaaatccgacggttcacctcagcgtctgaacgtgttgtggacttcagtgatggctctgtgctccgcgctaacgacctaaacgtgtcccagctacagtcttcacatattgccgaagaggcccgtgacagtgcgcttctggccatgcctgaggatgatgctggtaacctcgacgcgagaaaccgtaagattgtc…	MDQDIKTIIQYPTGATEFDIPFDYLSRKFVRVSLVSDDNRRLLRNITEYRYVSKTRVKILVDTTGFDRVEIRRFTSASERVVDFSDGSVLRANDLNVSQLQSSHIAEEARDSALLAMPEDDAGNLDARNRKIVRLAPGEVGTDAVNKDQLDTTLGEAGGILSEIKQTQQDIGDYIEEFANGTTYLKNIVMVYNQGSANGGETAIVLDRTDEVFAVPVIYINGDRQEVGFQFSYDNTTKTITLVKPLQRGDFVVMLTSEGTHSLASILAGPDGASRIGASGGLTVQQAIDRILESHIILPQWFGARGDWSDTTNTGTDDTAAFEAAIEMAVTLNYTEVYVPAGSYLITRELNLNGGNRNTRLGARIRGAGWASSVLVFKAPAPETPCISIIGTPGSHTSK…	2610	869		KP32gp38CP_KP34gp57	2001	666	AGACTGGCCTGATGAACTCCACAAAGGAGCTTGTGCCAAACGACCCGCTTACCCAACAGCTAATCATGAAAATCTATGAAGCTAATGGTGTCACCATAAAGCAGCAGCCTAGACCCAACTAATTAGGGCACACTATAGGGAGGCCGACTGGTTTCCCTCCTATTCAACTTAAGGAGGTCACCATGGACCAAGATATTAAAACAATCATTCAGTACCCAACAGGAGCCACTGAGTTTGACATCCCGTTTGACTACCTGTCCCGCAAGTTTGTCCGCGTGTCTCTGGTATCGGACGACAACCGCCGACTCTTGCGCAACATCACGGAGTACCGTTACGTGTCGAAGACTCGCGTTAAGATTCTGGTGGACACCACTGGGTTCGACCGAGTTGAAATCCGAC…	5001		10G+
KP32gp38_RBD2::KP36gp50_RBD	KP32gp37	atggaccaagatattaaaacaatcattcagtacccaacaggagccactgagtttgacatcccgtttgactacctgtcccgcaagtttgtccgcgtgtctctggtatcggacgacaaccgccgactcttgcgcaacatcacggagtaccgttacgtgtcgaagactcgcgttaagattctggtggacaccactgggttcgaccgagttgaaatccgacggttcacctcagcgtctgaacgtgttgtggacttcagtgatggctctgtgctccgcgctaacgacctaaacgtgtcccagctacagtcttcacatattgccgaagaggcccgtgacagtgcgcttctggccatgcctgaggatgatgctggtaacctcgacgcgagaaaccgtaagattgtc…	MDQDIKTIIQYPTGATEFDIPFDYLSRKFVRVSLVSDDNRRLLRNITEYRYVSKTRVKILVDTTGFDRVEIRRFTSASERVVDFSDGSVLRANDLNVSQLQSSHIAEEARDSALLAMPEDDAGNLDARNRKIVRLAPGEVGTDAVNKDQLDTTLGEAGGILSEIKQTQQDIGDYIEEFANGTTYLKNIVMVYNQGSANGGETAIVLDRTDEVFAVPVIYINGDRQEVGFQFSYDNTTKTITLVKPLQRGDFVVMLTSEGTHSLASILAGPDGASRIGASGGLTVQQAIDRILESHIILPQWFGARGDWSDTTNTGTDDTAAFEAAIEMAVTLNYTEVYVPAGSYLITRELNLNGGNRNTRLGARIRGAGWASSVLVFKAPAPETPCISIIGTPGSHTSK…	2610	869		KP32gp38CP_KP36gp50RBD	2358	785	TGACTGGCCTGATGAACTCCACAAAGGAGCTTGTGCCAAACGACCCGCTTACCCAACAGCTAATCATGAAAATCTATGAAGCTAATGGTGTCACCATAAAGCAGCAGCCTAGACCCAACTAATTAGGGCACACTATAGGGAGGCCGACTGGTTTCCCTCCTATTCAACTTAAGGAGGTCACCATGGACCAAGATATTAAAACAATCATTCAGTACCCAACAGGAGCCACTGAGTTTGACATCCCGTTTGACTACCTGTCCCGCAAGTTTGTCCGCGTGTCTCTGGTATCGGACGACAACCGCCGACTCTTGCGCAACATCACGGAGTACCGTTACGTGTCGAAGACTCGCGTTAAGATTCTGGTGGACACCACTGGGTTCGACCGAGTTGAAATCCGAC…	5338		11B-
K11gp0043:: K11gp0043	K11gp17	atggaccaagacattaaaacagtcattcagtacccagtaggggccactgagttcgacatcccgttcgactacctgtcccgtaagtttgtccgtgtgtcgctggcagctgacgacaaccgcagactgctgagtaacatcactgagtaccgctacgtgtctaagaccagagtgaagctccttgtggaaactaccgggttcgaccgtgtggaaatccgcagattcacctcagcgtctgagcgtattgttgacttcagcgacggctccgtactgcgggcaacagaccttaacgtttctcagattcagtctgcccatatcgcagaggaagcacgtgattcagcactgttggctatgccgcaggatgatgctggcaaccttgatgcccgtaaccgcagaatcgtt…	MDQDIKTVIQYPVGATEFDIPFDYLSRKFVRVSLAADDNRRLLSNITEYRYVSKTRVKLLVETTGFDRVEIRRFTSASERIVDFSDGSVLRATDLNVSQIQSAHIAEEARDSALLAMPQDDAGNLDARNRRIVRLAPGVEGTDAINKNQLDTTLGEAGGILSEIKQTEKDIQDYIENFADDTTSLKGINWVYNNGSANGGETSILITREGPVFAVPTIYINGDRQSVGYHYSYDSGDKTIHLVKPLTAGDFVECVTSEGVLPLSNLLSTPDGASQIGTKSGLTVQDYLNGVKSATILRNIEPVIDGQRIVLSEISPTLGPKSGGTLVYDQSDTSSVDDGYTVFVTAGGKRWKREESYIDVAWFGPNFGLALQTAVNLVDNYVRTVGFYSRKTIYIAAGT…	2628	875		K11gp0043_P6 (VersaTile Junction P6 is located between CP and RBD)	1791	596	TGACTGGCCTGATGAACTCCACCAAGGAGCTTGTTCCGAACGACCCACTGACCCAGCAGCTCATCATGAAAATCTATGAAGCCAACGGGGTCACCATCAAGCAGCAGCCGAAGCCTAACTAATTAGGACACACTATAGGGAGGCCGATTGGTTTCCCCCCTTCTCATTCAACTAAAGGAGGTCACCATGGACCAAGACATTAAAACAGTCATTCAGTACCCAGTAGGGGCCACTGAGTTCGACATCCCGTTCGACTACCTGTCCCGTAAGTTTGTCCGTGTGTCGCTGGCAGCTGACGACAACCGCAGACTGCTGAGTAACATCACTGAGTACCGCTACGTGTCTAAGACCAGAGTGAAGCTCCTTGTGGAAACTACCGGGTTCGACCGTGTGGAAATC…	4812		1F
K11gp0043::KP32gp38	K11gp17	atggaccaagacattaaaacagtcattcagtacccagtaggggccactgagttcgacatcccgttcgactacctgtcccgtaagtttgtccgtgtgtcgctggcagctgacgacaaccgcagactgctgagtaacatcactgagtaccgctacgtgtctaagaccagagtgaagctccttgtggaaactaccgggttcgaccgtgtggaaatccgcagattcacctcagcgtctgagcgtattgttgacttcagcgacggctccgtactgcgggcaacagaccttaacgtttctcagattcagtctgcccatatcgcagaggaagcacgtgattcagcactgttggctatgccgcaggatgatgctggcaaccttgatgcccgtaaccgcagaatcgtt…	MDQDIKTVIQYPVGATEFDIPFDYLSRKFVRVSLAADDNRRLLSNITEYRYVSKTRVKLLVETTGFDRVEIRRFTSASERIVDFSDGSVLRATDLNVSQIQSAHIAEEARDSALLAMPQDDAGNLDARNRRIVRLAPGVEGTDAINKNQLDTTLGEAGGILSEIKQTEKDIQDYIENFADDTTSLKGINWVYNNGSANGGETSILITREGPVFAVPTIYINGDRQSVGYHYSYDSGDKTIHLVKPLTAGDFVECVTSEGVLPLSNLLSTPDGASQIGTKSGLTVQDYLNGVKSATILRNIEPVIDGQRIVLSEISPTLGPKSGGTLVYDQSDTSSVDDGYTVFVTAGGKRWKREESYIDVAWFGPNFGLALQTAVNLVDNYVRTVGFYSRKTIYIAAGT…	2628	875		KP32gp38	1731	576	ggcctgatgaactccaccaaggagcttgttccgaacgacccactgacccagcagctcatcatgaaaatctatgaagccaacggggtcaccatcaagcagcagccgaagcctaactaattaggacacactatagggaggccgattggtttccccccttctcattcaactaaaggaggtcaccatggaccaagacattaaaacagtcattcagtacccagtaggggccactgagttcgacatcccgttcgactacctgtcccgtaagtttgtccgtgtgtcgctggcagctgacgacaaccgcagactgctgagtaacatcactgagtaccgctacgtgtctaagaccagagtgaagctccttgtggaaactaccgggttcgaccgtgtggaaatccgcag…	4742		43.6
K11gp0043_RBD2::KP32gp37_RBD1	K11gp17	atggaccaagacattaaaacagtcattcagtacccagtaggggccactgagttcgacatcccgttcgactacctgtcccgtaagtttgtccgtgtgtcgctggcagctgacgacaaccgcagactgctgagtaacatcactgagtaccgctacgtgtctaagaccagagtgaagctccttgtggaaactaccgggttcgaccgtgtggaaatccgcagattcacctcagcgtctgagcgtattgttgacttcagcgacggctccgtactgcgggcaacagaccttaacgtttctcagattcagtctgcccatatcgcagaggaagcacgtgattcagcactgttggctatgccgcaggatgatgctggcaaccttgatgcccgtaaccgcagaatcgtt…	MDQDIKTVIQYPVGATEFDIPFDYLSRKFVRVSLAADDNRRLLSNITEYRYVSKTRVKLLVETTGFDRVEIRRFTSASERIVDFSDGSVLRATDLNVSQIQSAHIAEEARDSALLAMPQDDAGNLDARNRRIVRLAPGVEGTDAINKNQLDTTLGEAGGILSEIKQTEKDIQDYIENFADDTTSLKGINWVYNNGSANGGETSILITREGPVFAVPTIYINGDRQSVGYHYSYDSGDKTIHLVKPLTAGDFVECVTSEGVLPLSNLLSTPDGASQIGTKSGLTVQDYLNGVKSATILRNIEPVIDGQRIVLSEISPTLGPKSGGTLVYDQSDTSSVDDGYTVFVTAGGKRWKREESYIDVAWFGPNFGLALQTAVNLVDNYVRTVGFYSRKTIYIAAGT…	2628	875		K11gp0043CP_KP32gp37RBD	1950	649	TGACTGGCCTGATGAACTCCACCAAGGAGCTTGTTCCGAACGACCCACTGACCCAGCAGCTCATCATGAAAATCTATGAAGCCAACGGGGTCACCATCAAGCAGCAGCCGAAGCCTAACTAATTAGGACACACTATAGGGAGACCGATTGGTTTCCCCCCTTCTCATTCAACTAAAGGAGGTCACCATGGACCAAGACATTAAAACAGTCATTCAGTACCCAGTAGGGGCCACTGAGTTCGACATCCCGTTCGACTACCTGTCCCGTAAGTTTGTCCGTGTGTCGCTGGCAGCTGACGACAACCGCAGACTGCTGAGTAACATCACTGAGTACCGCTACGTGTCTAAGACCAGAGTGAAGCTCCTTGTGGAAACTACCGGGTTCGACCGTGTGGAAATC…	4971		2A
K11gp17_RBD1aa364::KP32gp37_RBD1aa304	K11gp17ABaa304_ KP32gp37RBDaa304
K11gp0043_RBD2::KP34gp57	K11gp17	atggaccaagacattaaaacagtcattcagtacccagtaggggccactgagttcgacatcccgttcgactacctgtcccgtaagtttgtccgtgtgtcgctggcagctgacgacaaccgcagactgctgagtaacatcactgagtaccgctacgtgtctaagaccagagtgaagctccttgtggaaactaccgggttcgaccgtgtggaaatccgcagattcacctcagcgtctgagcgtattgttgacttcagcgacggctccgtactgcgggcaacagaccttaacgtttctcagattcagtctgcccatatcgcagaggaagcacgtgattcagcactgttggctatgccgcaggatgatgctggcaaccttgatgcccgtaaccgcagaatcgtt…	MDQDIKTVIQYPVGATEFDIPFDYLSRKFVRVSLAADDNRRLLSNITEYRYVSKTRVKLLVETTGFDRVEIRRFTSASERIVDFSDGSVLRATDLNVSQIQSAHIAEEARDSALLAMPQDDAGNLDARNRRIVRLAPGVEGTDAINKNQLDTTLGEAGGILSEIKQTEKDIQDYIENFADDTTSLKGINWVYNNGSANGGETSILITREGPVFAVPTIYINGDRQSVGYHYSYDSGDKTIHLVKPLTAGDFVECVTSEGVLPLSNLLSTPDGASQIGTKSGLTVQDYLNGVKSATILRNIEPVIDGQRIVLSEISPTLGPKSGGTLVYDQSDTSSVDDGYTVFVTAGGKRWKREESYIDVAWFGPNFGLALQTAVNLVDNYVRTVGFYSRKTIYIAAGT…	2628	875		K11gp0043CP_KP34gp57	2004	667	tgactggcctgatgaactccaccaaggagcttgttccgaacgacccactgacccagcagctcatcatgaaaatctatgaagccaacggggtcaccatcaagcagcagccgaagcctaactaattaggacacactatagggaggccgattggtttccccccttctcattcaactaaaggaggtcaccatggaccaagacattaaaacagtcattcagtacccagtaggggccactgagttcgacatcccgttcgactacctgtcccgtaagtttgtccgtgtgtcgctggcagctgacgacaaccgcagactgctgagtaacatcactgagtaccgctacgtgtctaagaccagagtgaagctccttgtggaaactaccgggttcgaccgtgtggaaatc…	5025		1G
Phages with exchanged RBP1 and RBP2
K32gp37::K11gp17 & KP32gp38_RBD2:: KP32gp37_RBD1	K11gp17	atggaccaagacattaaaacagtcattcagtacccagtaggggccactgagttcgacatcccgttcgactacctgtcccgtaagtttgtccgtgtgtcgctggcagctgacgacaaccgcagactgctgagtaacatcactgagtaccgctacgtgtctaagaccagagtgaagctccttgtggaaactaccgggttcgaccgtgtggaaatccgcagattcacctcagcgtctgagcgtattgttgacttcagcgacggctccgtactgcgggcaacagaccttaacgtttctcagattcagtctgcccatatcgcagaggaagcacgtgattcagcactgttggctatgccgcaggatgatgctggcaaccttgatgcccgtaaccgcagaatcgtt…	MDQDIKTVIQYPVGATEFDIPFDYLSRKFVRVSLAADDNRRLLSNITEYRYVSKTRVKLLVETTGFDRVEIRRFTSASERIVDFSDGSVLRATDLNVSQIQSAHIAEEARDSALLAMPQDDAGNLDARNRRIVRLAPGVEGTDAINKNQLDTTLGEAGGILSEIKQTEKDIQDYIENFADDTTSLKGINWVYNNGSANGGETSILITREGPVFAVPTIYINGDRQSVGYHYSYDSGDKTIHLVKPLTAGDFVECVTSEGVLPLSNLLSTPDGASQIGTKSGLTVQDYLNGVKSATILRNIEPVIDGQRIVLSEISPTLGPKSGGTLVYDQSDTSSVDDGYTVFVTAGGKRWKREESYIDVAWFGPNFGLALQTAVNLVDNYVRTVGFYSRKTIYIAAGT…	2628	875		KP32gp38CP_KP32gp37RBD	1947	648	tgactggcctgatgaactccacaaaggagcttgtgccaaacgacccgcttacccaacagctaatcatgaaaatctatgaagctaatggtgtcaccataaagcagcagcctagacccaactaattagggcacactatagggaggccgactggtttccctcctattcaacttaaggaggtcaccatggaccaagacattaaaacagtcattcagtacccagtaggggccactgagttcgacatcccgttcgactacctgtcccgtaagtttgtccgtgtgtcgctggcagctgacgacaaccgcagactgctgagtaacatcactgagtaccgctacgtgtctaagaccagagtgaagctccttgtggaaactaccgggttcgaccgtgtggaaatccgca…	4965		3.4
